# Supplementary material
Source: PubMed Central journal article supplement (PMC2793542)
Supplement: NIHMS161071-supplement-1.pdf [file NIHMS161071-supplement-1.pdf]

## Supporting Information

**Simple, Rapid, Sensitive, and Versatile SWNT-Paper Sensor for Environmental Toxin Detection Competitive with ELISA**

Libing Wang,<sup>1#</sup> Wei Chen,<sup>1, 2#</sup> Dinghua Xu,<sup>1#</sup> Bong Sup Shim,<sup>2</sup> Yingyue Zhu,<sup>1</sup> Fengxia Sun,<sup>1</sup> Liqiang Liu,<sup>1</sup> Chifang Peng,<sup>1</sup> Zhengyu Jin,<sup>1</sup> Chuanlai Xu,<sup>1, 2\*</sup> Nicholas A. Kotov<sup>2\*</sup>

<sup>1</sup>School of Food Science and Technology, State Key Lab of the Food Science & Technology, Jiangnan University, Wuxi, Jiangsu Province, 214122, China;

<sup>2</sup>Department of Chemical Engineering, Department of Materials Science and Engineering, Department of Biomedical Engineering, University of Michigan, Ann Arbor, Michigan 48109, USA.

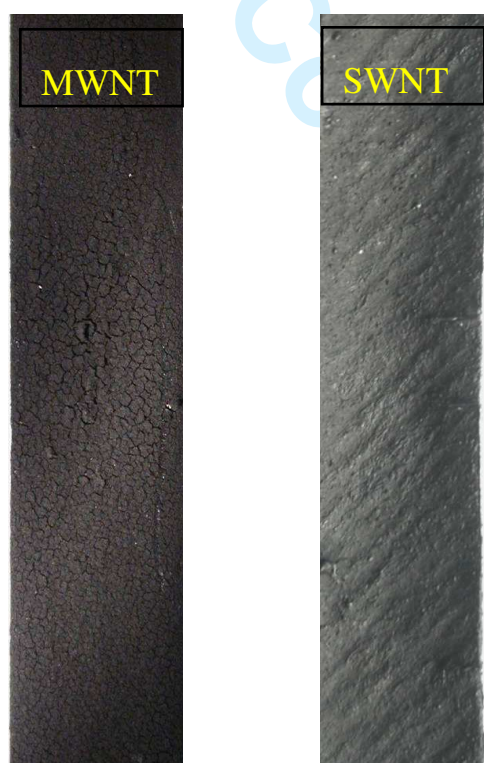

**Figure S1.** Optical photographs of the MWNT and SWNT coated paper electrodes.

\*To Whom correspondence should be addressed. E-mail: xcl@jiangnan.edu.cn; kotov@umich.edu

# These three authors contribute equally to this paper.

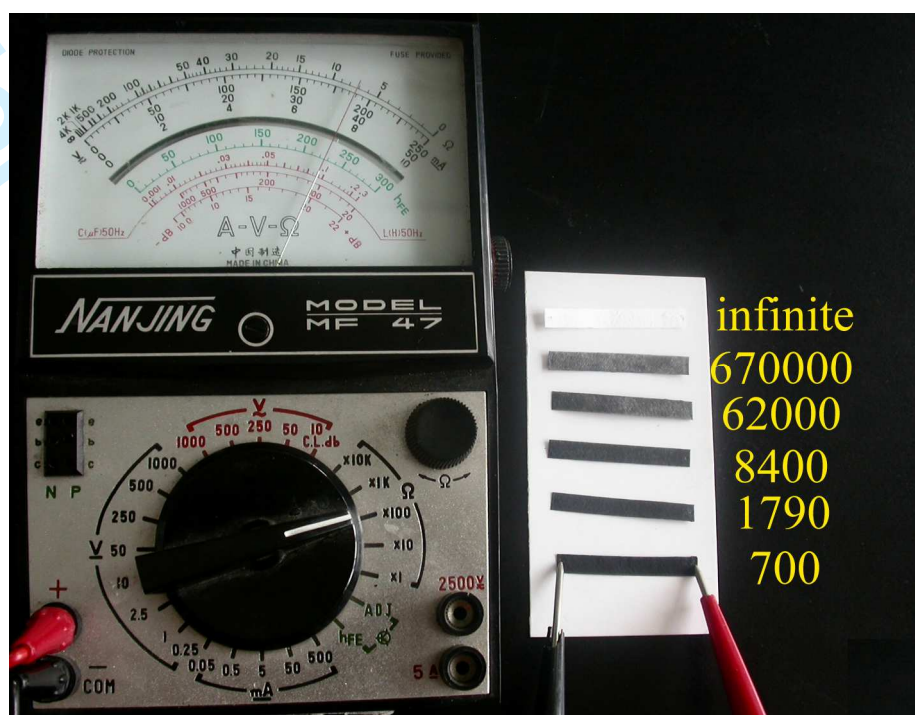

**Figure S2.** The conductivity of SWNT-impregnated filter paper

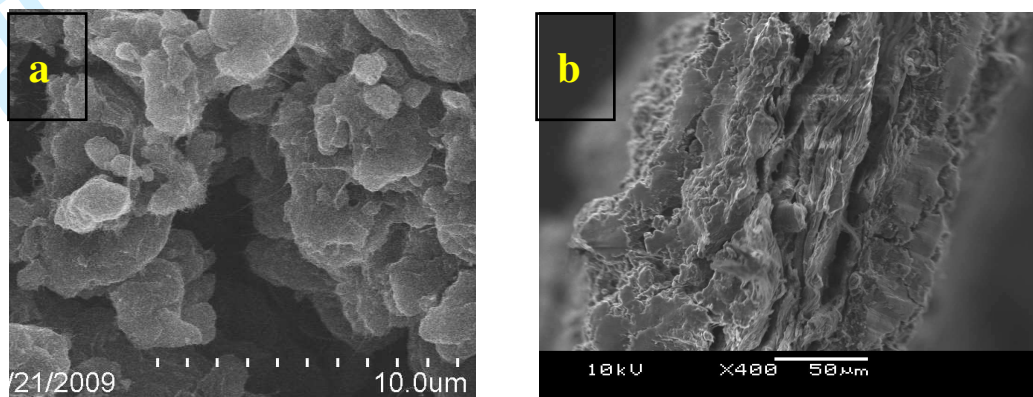

**Figure S3.** The SEM images of (a) the face and (b) the edge of the 13 deposition cycles paper electrode.

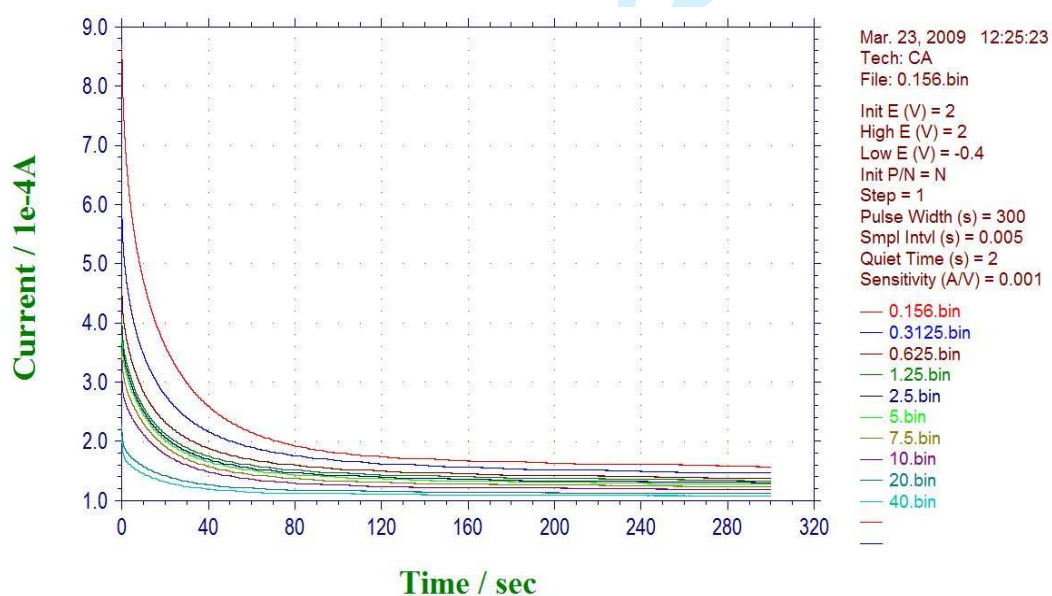

**Figure S4.** Amperometric  $i-t$  traces for sensing of the target samples of MC-LR

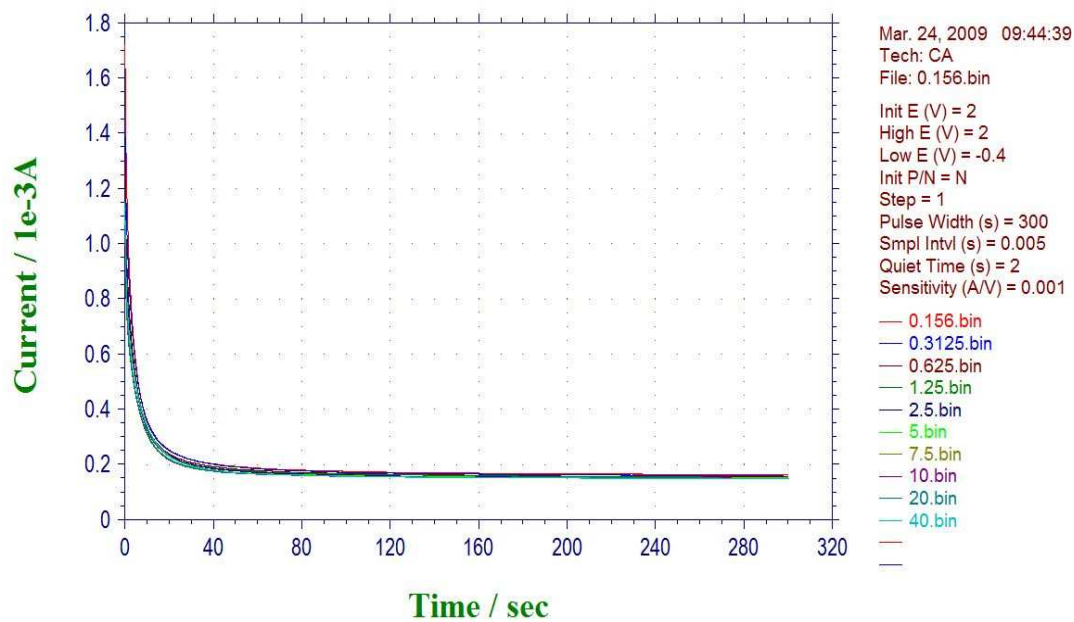

6  
7  
8  
9  
10  
11  
12  
13  
14  
15  
16  
17  
18  
19  
20  
21  
22  
23  
24  
25  
26  
27  
28  
29

6  
7  
8  
9  
10  
11  
12  
13  
14  
15  
16  
17  
18  
19  
20  
21  
22  
23  
24  
25  
26  
27  
28  
29

**Figure S5.** Amperometric  $i-t$  traces for sensing of the control samples of ochratoxin.

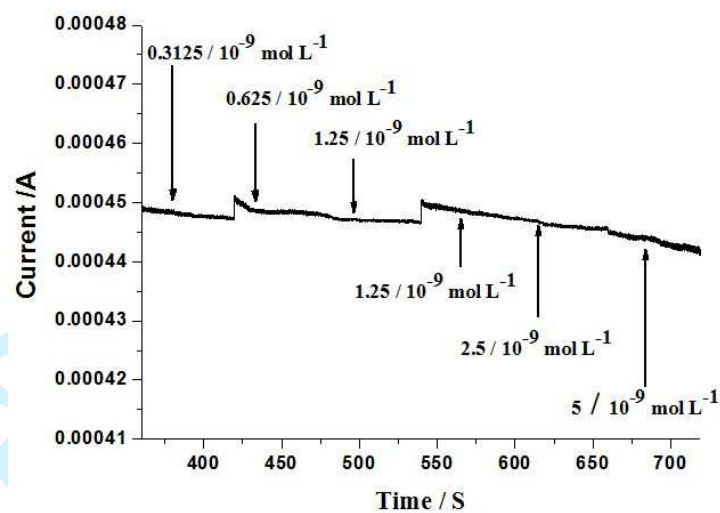

Figure S6. The sensing results for the control samples of ochratoxin.

1 **The detailed process of the ELISA is as follows:**

- 2 1. Coat each well in a 96-well plate (Costar #9018) with 100  $\mu$ L of a coating antigen  
3 solution.  
4 2. Cover and rock overnight in an incubator at 4°C.  
5 3. Wash 3 times with PBS-Tween 20 in vacuum-apparatus and pat dry.  
6 4. The plate was blocked with 100 $\mu$ L (0.5%, w/v) OVA solution in PBS solution for  
7 2 h at 37 °C.  
8 5. Wash 3times with PBS-Tween 20.  
9 6. Add 100  $\mu$ L/well MC-LR at different dilutions or samples with 100 $\mu$ L/well pAb  
10 then incubate for 0.5 hour at 37 °C.  
11 7. Wash 3times with PBS-Tween 20 and pat dry.  
12 8. Dilute horseradish peroxidase-conjugated goat anti-rabbit IgG 1 : 3000 in  
13 PBS-Tween 20 for 0.5 hour and incubate as before.  
14 9. Wash 6times as before and pat dry.  
15 10. Prepare color substrate (TMB) and add 100  $\mu$ L/well for 15 min in dark at room  
16 temperature.  
17 11. H<sub>2</sub>SO<sub>4</sub> (2 mol/L) was added to stop the reaction and record the absorption in a  
18 micro plate reader at 450nm.
