# Supplementary material
Source: PubMed Central journal article supplement (PMC2793542)
Supplement: NIHMS161071-supplement-1_si_001.pdf [file NIHMS161071-supplement-1_si_001.pdf]

1 **Supporting Information**

2 **Simple, Rapid, Sensitive, and Versatile SWNT-Paper Sensor for**  
3 **Environmental Toxin Detection Competitive with ELISA**

4 Libing Wang,<sup>1#</sup> Wei Chen,<sup>1, 2#</sup> Dinghua Xu,<sup>1#</sup> Bong Sup Shim,<sup>2</sup> Yingyue Zhu,<sup>1</sup>  
5 Fengxia Sun,<sup>1</sup> Liqiang Liu,<sup>1</sup> Chifang Peng,<sup>1</sup> Zhengyu Jin,<sup>1</sup> Chuanlai Xu,<sup>1, 2\*</sup> Nicholas  
6 A. Kotov<sup>2\*</sup>  
7

8  
9 <sup>1</sup>School of Food Science and Technology, State Key Lab of the Food Science &  
10 Technology, Jiangnan University, Wuxi, Jiangsu Province, 214122 , China;

11  
12 <sup>2</sup>Department of Chemical Engineering, Department of Materials Science and  
13 Engineering, Department of Biomedical Engineering, University of Michigan , Ann  
14 Arbor, Michigan 48109, USA.

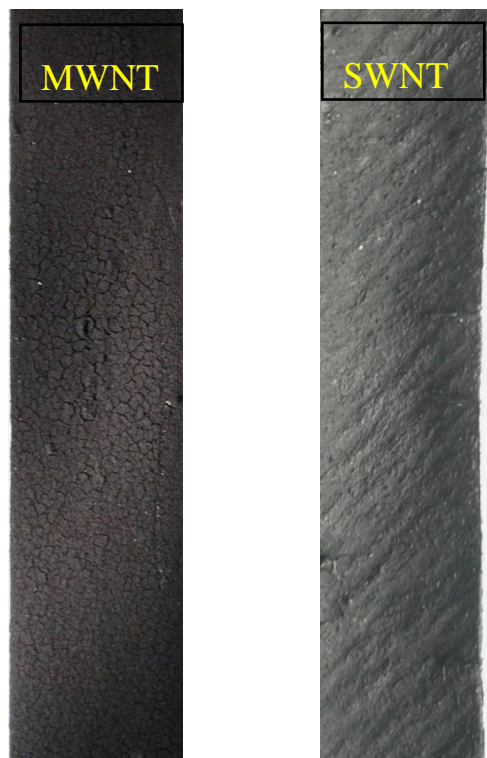

---

\*To Whom correspondence should be addressed. E-mail: xcl@jiangnan.edu.cn; kotov@umich.edu

# These three authors contribute equally to this paper.

1 **Figure S1.** Optical photographs of the MWNT and SWNT coated paper electrodes.  
2  
3  
4  
5  
6

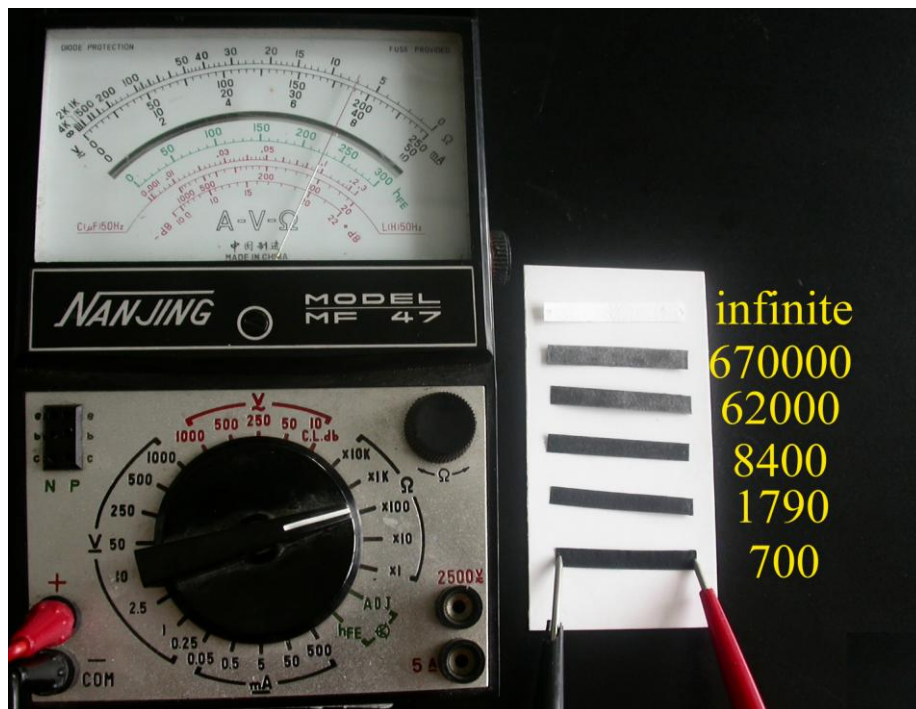

7  
8  
9  
10  
11  
12  
13  
14  
15  
16  
17  
18  
19  
20  
21  
22  
23  
24  
25  
26  
27  
28

**Figure S2.** The conductivity of SWNT-impregnated filter paper

1  
2  
3  
4  
5  
6

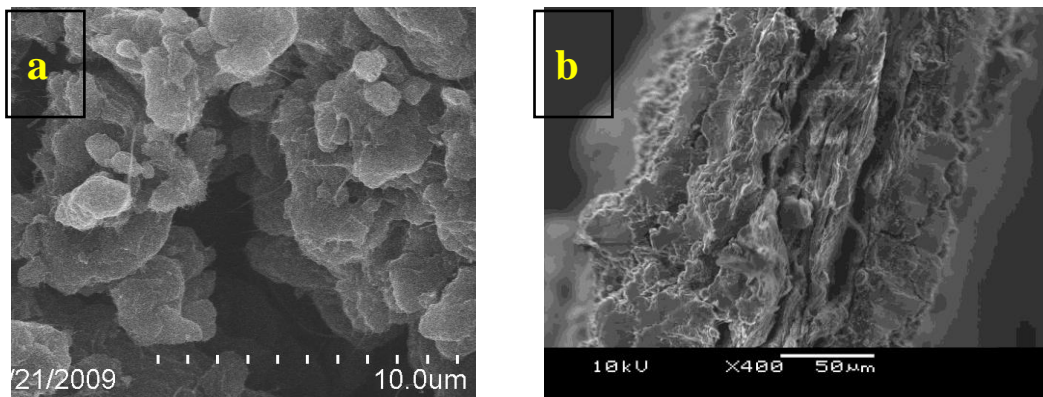

7  
8  
9

10 **Figure S3.** The SEM images of (a) the face and (b) the edge of the 13 deposition  
11 cycles paper electrode.

12  
13  
14  
15  
16  
17

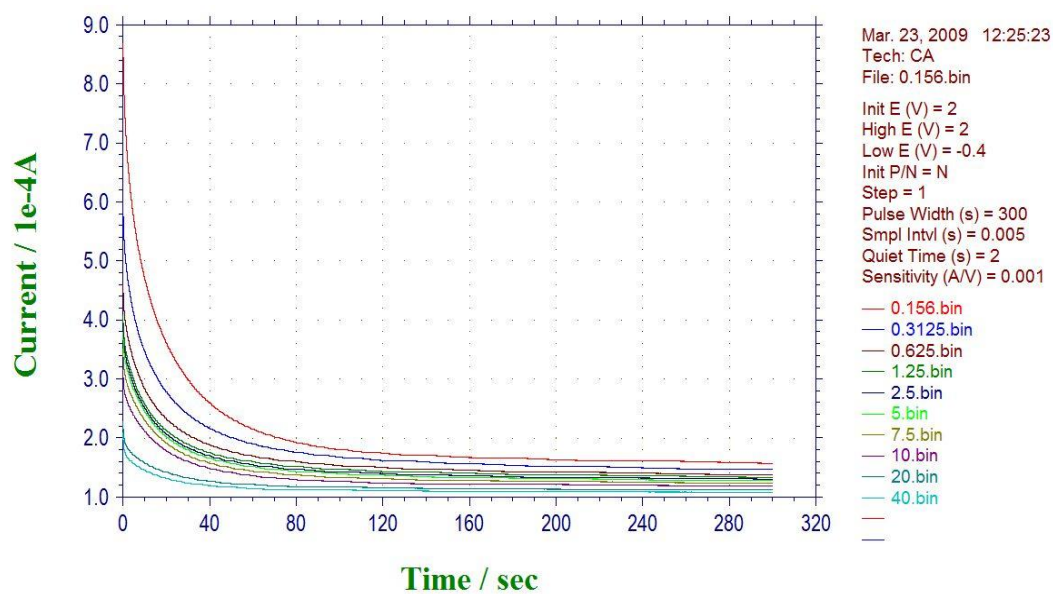

18  
19

**Figure S4.** Amperometric *i-t* traces for sensing of the target samples of MC-LR

1  
2  
3  
4  
5  
6  
7

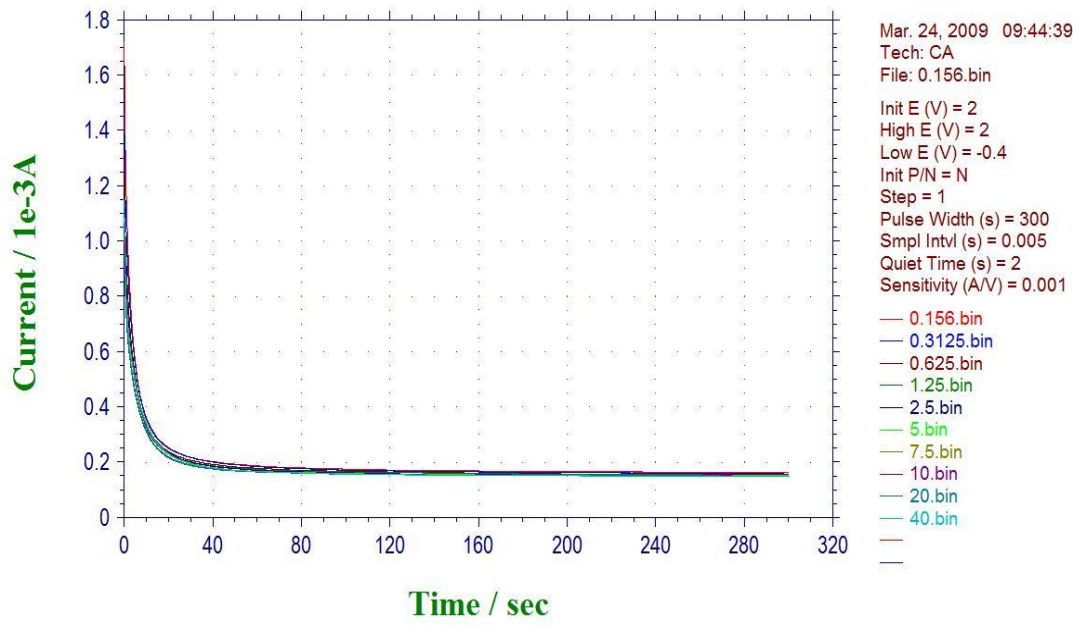

8  
9  
10  
11  
12  
13  
14  
15  
16  
17  
18  
19  
20  
21  
22  
23  
24  
25  
26  
27  
28  
29

**Figure S5.** Amperometric *i-t* traces for sensing of the control samples of ochratoxin.

1  
2

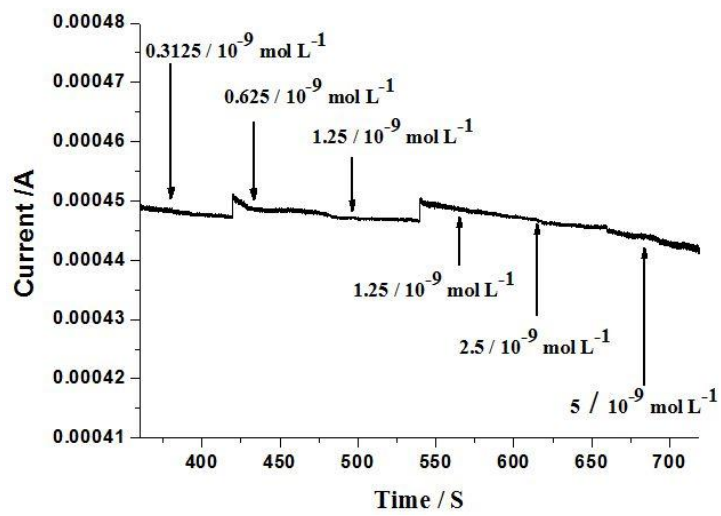

3  
4  
5  
6  
7  
8  
9  
10  
11  
12  
13  
14  
15  
16  
17  
18  
19  
20  
21  
22  
23  
24  
25  
26  
27  
28  
29  
30  
31  
32

**Figure S6.** The sensing results for the control samples of ochratoxin.

1

2

3 **The detailed process of the ELISA is as follows:**

4 1. Coat each well in a 96-well plate (Costar #9018) with 100  $\mu$ L of a coating antigen  
5 solution.

6 2. Cover and rock overnight in an incubator at 4°C.

7 3. Wash 3 times with PBS-Tween 20 in vacuum-apparatus and pat dry.

8 4. The plate was blocked with 100 $\mu$ L (0.5%, w/v) OVA solution in PBS solution for  
9 2 h at 37 °C.

10 5. Wash 3times with PBS-Tween 20.

11 6. Add 100  $\mu$ L/well MC-LR at different dilutions or samples with 100 $\mu$ L/well pAb  
12 then incubate for 0.5 hour at 37 °C.

13 7. Wash 3times with PBS-Tween 20 and pat dry.

14 8. Dilute horseradish peroxidase-conjugated goat anti-rabbit IgG 1 : 3000 in  
15 PBS-Tween 20 for 0.5 hour and incubate as before.

16 9. Wash 6times as before and pat dry.

17 10. Prepare color substrate (TMB) and add 100  $\mu$ L/well for 15 min in dark at room  
18 temperature.

19 11. H<sub>2</sub>SO<sub>4</sub> (2 mol/L) was added to stop the reaction and record the absorption in a  
20 micro plate reader at 450nm.
